# Supplementary material for: Hot-Melt-Extruded Active Films Prepared from EVOH/Trans-Cinnamaldehyde Blends Intended for Food Packaging Applications
Source: MDPI journal article supplement (doi:10.3390/foods10071591), 2021-07-08
Supplement: s1 [file s1]

## SUPPORTING INFORMATION

### Hot-melt-extruded Active Films Prepared from EVOH/trans-cinnamaldehyde Blends Intended for Food Packaging Applications

**Alejandro Aragón-Gutiérrez**<sup>1,\*</sup>, **Raquel Heras-Mozos**<sup>2</sup>, **Miriam Gallur**<sup>1</sup>, **Daniel López**<sup>3</sup>,  
**Rafael Gavara**<sup>2</sup> and **Pilar Hernández-Muñoz**<sup>2,\*</sup>

<sup>1</sup> Grupo de Tecnología de Envases y Embalajes, Instituto Tecnológico del Embalaje, Transporte y Logística, ITENE, Unidad Asociada al CSIC, calle de Albert Einstein 1, 46980 Paterna, Valencia, Spain; miriam.gallur@itene.com (M.G.)

<sup>2</sup> Instituto de Agroquímica y Tecnología de Alimentos, IATA-CSIC, calle del Catedrático Agustín Escardino Benlloch 7, 46980 Paterna, Valencia, Spain; [r.heras@iata.csic.es](mailto:r.heras@iata.csic.es) (R.H.-M.) [rgavara@iata.csic.es](mailto:rgavara@iata.csic.es) (R.G.)

<sup>3</sup> Instituto de Ciencia y Tecnología de Polímeros, ICTP-CSIC, calle Juan de la Cierva 3, 28006 Madrid, Spain; [daniel.l.g@csic.es](mailto:daniel.l.g@csic.es) (D.L.)

\* Correspondence: [alejandro.aragon@itene.com](mailto:alejandro.aragon@itene.com) (A.A.-G.); [phernan@iata.csic.es](mailto:phernan@iata.csic.es) (P.H.-M.); Tel.: +34-961 820 000 (A.A.-G.); +34-963 900 022 (P.H.-M.)

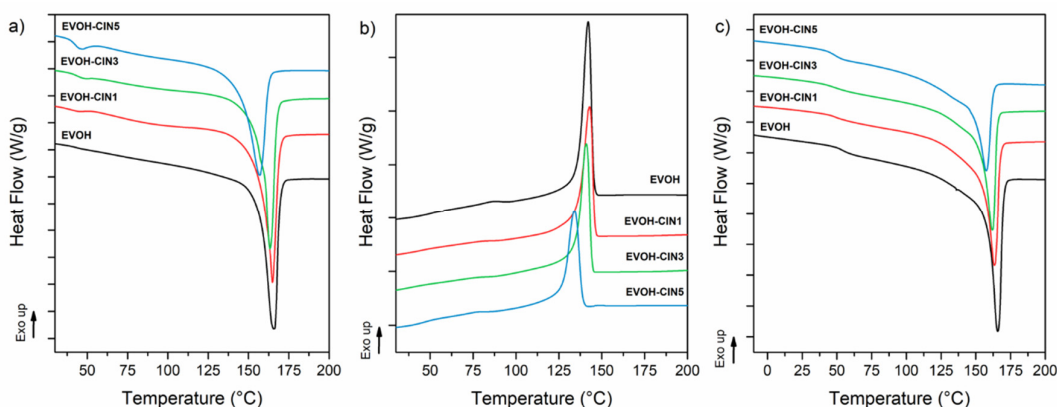

**Figure S1.** First heating DSC curves (a), cooling DSC curves (b), and second heating DSC curves (c) of EVOH and EVOH-CIN films

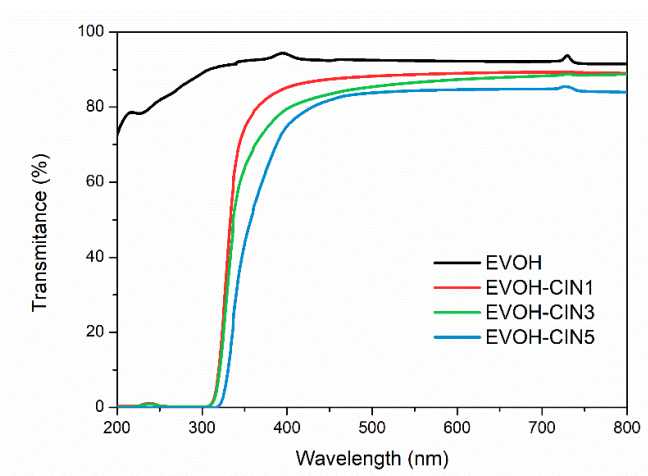

**Figure S2.** UV-vis light transmission of films in the range of 250-800 nm
